# Supplementary material
Source: HighWire-hosted journal article supplement (https://oem.bmj.com/content/75/2/132)
Supplement: inline-supplementary-material-1 [file inline-supplementary-material-1.pdf]

**Table S1:** Relationship to the Metabolic Syndrome

| <b><u>Variable</u></b>                                 | <b><u>p-value</u><sup>*</sup></b> |
|--------------------------------------------------------|-----------------------------------|
| Achieve physical activity recommendations <sup>†</sup> | 0.38                              |
| Current smoker                                         | 0.77                              |
| Drink >3 caffeinated beverages/day                     |                                   |
| Usually/often/sometimes                                | 0.69                              |
| Rarely/never                                           |                                   |
| Drink >1-2 alcoholic beverages/day                     |                                   |
| Usually/often/sometimes                                | 0.65                              |
| Rarely/never                                           |                                   |
| High life stress present <sup>‡</sup>                  | 0.69                              |
| Emotional health score <sup>§</sup>                    | 0.96                              |

<sup>\*</sup>Wilcoxon rank-sum test for continuous variables and Chi-Square or Fisher's test for categorical variables;

<sup>†</sup> WHO guidelines;[17] <sup>‡</sup> Derogatis Stress Profile;[18] <sup>§</sup> Centre for Epidemiologic Studies Depression Scale Revised;[19]
